# Supplementary material
Source: HighWire-hosted journal article supplement (https://cmajopen.ca/highwire/filestream/90746/field_highwire_adjunct_files/1/open-2022-0181-2-at.pdf)
Supplement: open-2022-0181-2-at.pdf [file open-2022-0181-2-at.pdf]

## Appendix 2 – Coding framework (ICD-10 codes used to identify serious illnesses)

The original framework we are using is comprised by ICD-10 codes, and the Discharge Abstract Database (DAD) captures ICD-10-CA codes, which are developed by the World Health Organization and refined by the Canadian Institute for Health Information (CIHI) to meet Canadian needs, but the meaning of the codes remains the same.<sup>1</sup>

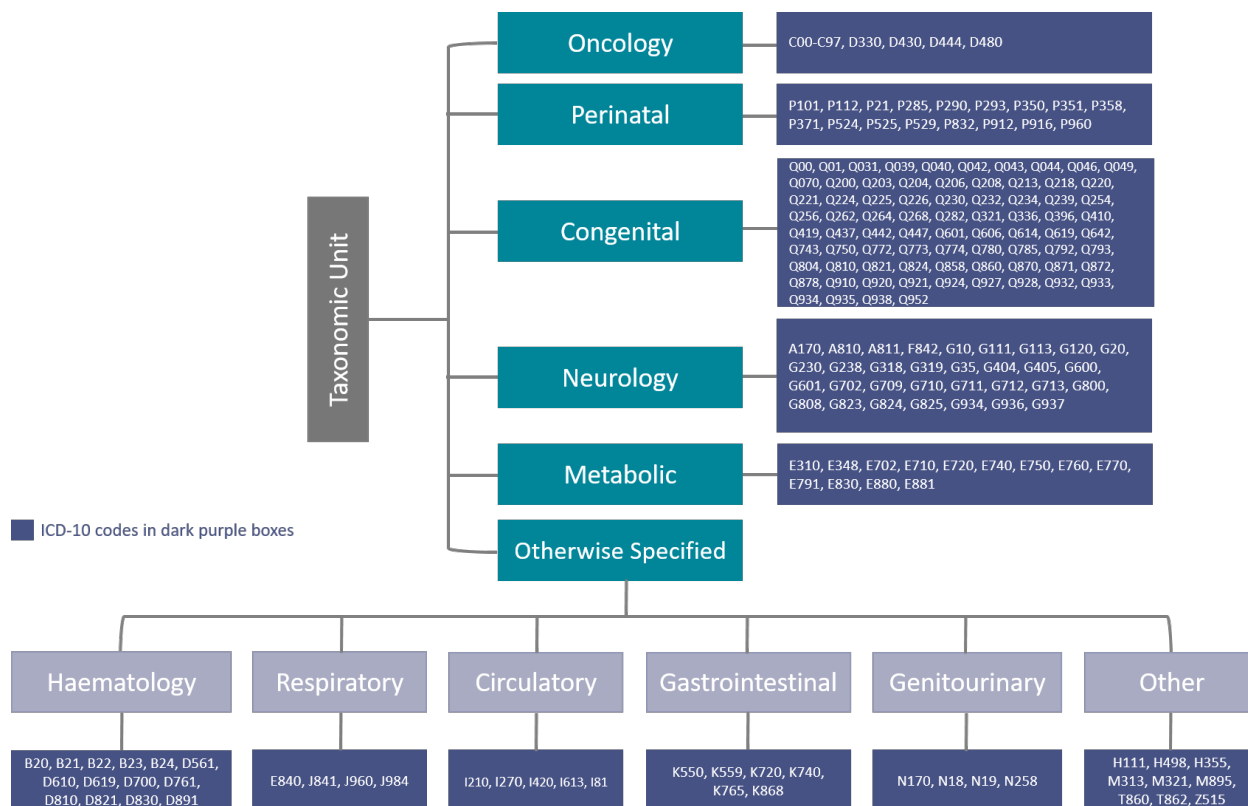

| Taxonomic unit | ICD-10 Code              | Description                                                    |
|----------------|--------------------------|----------------------------------------------------------------|
| Oncology       | C00-C97                  | All malignancies                                               |
|                | D33.0                    | Benign neoplasm of brain, supratentorial                       |
|                | D43.0                    | Neoplasm of uncertain behavior of brain, supratentorial        |
|                | D44.4                    | Neoplasm of uncertain behavior of craniopharyngeal duct        |
| Perinatal      | D48.0                    | Neoplasm of uncertain behavior of bone and articular cartilage |
|                | P10.1                    | Cerebral hemorrhage due to birth injury                        |
|                | P11.2                    | Unspecified brain damage due to birth injury                   |
|                | P21                      | Birth asphyxia                                                 |
|                | P28.5                    | Respiratory failure of the newborn                             |
| P29.0          | Neonatal cardiac failure |                                                                |

|                   |                                                                  |                                                                    |
|-------------------|------------------------------------------------------------------|--------------------------------------------------------------------|
|                   | P29.3                                                            | Persistent fetal circulation                                       |
|                   | P35.0                                                            | Congenital rubella syndrome                                        |
|                   | P35.1                                                            | Congenital cytomegalovirus infection                               |
|                   | P35.8                                                            | Other congenital viral diseases                                    |
|                   | P37.1                                                            | Congenital toxoplasmosis                                           |
|                   | P52.4                                                            | Intracerebral (nontraumatic) hemorrhage of the newborn             |
|                   | P52.5                                                            | Subarachnoid (nontraumatic) hemorrhage of the newborn              |
|                   | P52.9                                                            | Intracranial (nontraumatic) hemorrhage of the newborn, unspecified |
|                   | P83.2                                                            | Hydrops fetalis not due to hemolytic disease                       |
|                   | P91.2                                                            | Neonatal cerebral leukomalacia                                     |
|                   | P91.6                                                            | Hypoxic ischemic encephalopathy (HIE)                              |
| P96.0             | Congenital renal failure                                         |                                                                    |
| <b>Congenital</b> | Q00                                                              | Anencephaly                                                        |
|                   | Q01                                                              | Frontal encephalocele                                              |
|                   | Q03.1                                                            | Atresia of foramina of Magendie and Luschka                        |
|                   | Q03.9                                                            | Congenital hydrocephalus, unspecified                              |
|                   | Q04.0                                                            | Congenital malformations of corpus callosum                        |
|                   | Q04.2                                                            | Holoprosencephaly                                                  |
|                   | Q04.3                                                            | Other reduction deformities of the brain                           |
|                   | Q04.4                                                            | Septo-optic dysplasia of the brain                                 |
|                   | Q04.6                                                            | Congenital cerebral cysts                                          |
|                   | Q04.9                                                            | Congenital malformation of the brain, unspecified                  |
|                   | Q07.0                                                            | Arnold-Chiari syndrome                                             |
|                   | Q20.0                                                            | Common arterial trunk                                              |
|                   | Q20.3                                                            | Discordant ventriculoarterial connection                           |
|                   | Q20.4                                                            | Double inlet ventricle                                             |
|                   | Q20.6                                                            | Isomerism of the atrial appendages                                 |
|                   | Q20.8                                                            | Other congenital malformations cardiac chambers and connections    |
|                   | Q21.3                                                            | Tetralogy of Fallot                                                |
|                   | Q21.8                                                            | Other congenital malformations of cardiac septa                    |
|                   | Q22.0                                                            | Pulmonary valve atresia                                            |
|                   | Q22.1                                                            | Congenital pulmonary valve stenosis                                |
|                   | Q22.4                                                            | Congenital tricuspid valve stenosis                                |
|                   | Q22.5                                                            | Ebstein's anomaly                                                  |
|                   | Q22.6                                                            | Hypoplastic right heart syndrome                                   |
|                   | Q23.0                                                            | Congenital stenosis of the aortic valve                            |
| Q23.2             | Congenital mitral stenosis                                       |                                                                    |
| Q23.4             | Hypoplastic left heart syndrome                                  |                                                                    |
| Q23.9             | Congenital malformation of aortic and mitral valves, unspecified |                                                                    |

|       |                                                                                   |
|-------|-----------------------------------------------------------------------------------|
| Q25.4 | Other congenital malformations of the aorta                                       |
| Q25.6 | Stenosis of the pulmonary artery                                                  |
| Q26.2 | Total anomalous pulmonary venous connection                                       |
| Q26.4 | Anomalous pulmonary venous connection, unspecified                                |
| Q26.8 | Other congenital malformations of the great veins                                 |
| Q28.2 | Arteriovenous malformation of the cerebral vessels                                |
| Q32.1 | Other congenital malformations of the trachea                                     |
| Q33.6 | Congenital hypoplasia and dysplasia of the lung                                   |
| Q39.6 | Congenital diverticulum of the esophagus                                          |
| Q41.0 | Congenital absence, atresia and stenosis of the duodenum                          |
| Q41.9 | Congenital absence, atresia and stenosis of the small intestine, part unspecified |
| Q43.7 | Persistent cloaca                                                                 |
| Q44.2 | Atresia of the bile ducts                                                         |
| Q44.7 | Other congenital malformation of the liver                                        |
| Q60.1 | Renal agenesis, bilateral                                                         |
| Q60.6 | Potter's syndrome                                                                 |
| Q61.4 | Renal dysplasia                                                                   |
| Q61.9 | Cystic kidney disease, unspecified                                                |
| Q64.2 | Congenital posterior urethral valves                                              |
| Q74.3 | Arthrogryposis multiplex congenital                                               |
| Q75.0 | Craniosynostosis                                                                  |
| Q77.2 | Short rib syndrome                                                                |
| Q77.3 | Chondrodysplasia pun                                                              |
| Q77.4 | Achondroplasia                                                                    |
| Q78.0 | Osteogenesis imperfecta                                                           |
| Q78.5 | Metaphyseal dysplasia                                                             |
| Q79.2 | Exomphalos                                                                        |
| Q79.3 | Gastroschisis                                                                     |
| Q80.4 | Harlequin fetus                                                                   |
| Q81.0 | Epidermolysis bullosa simplex                                                     |
| Q82.1 | Xeroderma pigmentosum                                                             |
| Q82.4 | Ectodermal dysplasia (anhidrotic)                                                 |
| Q85.8 | Other phakomatoses, not elsewhere classified                                      |
| Q86.0 | Fetal alcohol syndrome (dysmorphic)                                               |
| Q87.0 | Congenital malformation syndromes predominantly affecting facial appearance       |
| Q87.1 | Congenital malformation syndromes predominantly associated with short stature     |
| Q87.2 | Congenital malformation syndromes predominantly involving limbs                   |

|           |                                                  |                                                                             |
|-----------|--------------------------------------------------|-----------------------------------------------------------------------------|
|           | Q87.8                                            | Other specified congenital malformation syndromes, not elsewhere classified |
|           | Q91.0                                            | Trisomy 18, nonmosaicism (meiotic nondisjunction)                           |
|           | Q92.0                                            | Whole chromosome trisomy, nonmosaicism (meiotic nondisjunction)             |
|           | Q92.1                                            | Whole chromosome trisomy, mosaicism (mitotic nondisjunction)                |
|           | Q92.4                                            | Duplications seen only at prometaphase                                      |
|           | Q92.7                                            | Triploidy and polyploidy                                                    |
|           | Q92.8                                            | Other specified trisomies and partial trisomies of autosomes                |
|           | Q93.2                                            | Chromosome replaced with ring, dicentric or isochromosome                   |
|           | Q93.3                                            | Deletion of short arm of chromosome 4                                       |
|           | Q93.4                                            | Deletion of short arm of chromosome 5                                       |
|           | Q93.5                                            | Other deletions of part of a chromosome                                     |
|           | Q93.8                                            | Other deletions from the autosomes                                          |
|           | Q95.2                                            | Balanced autosomal rearrangement in abnormal individual                     |
| Neurology | A17.0                                            | Tuberculous meningitis                                                      |
|           | A81.0                                            | Creutzfeldt-Jakob disease                                                   |
|           | A81.1                                            | Subacute sclerosing panencephalitis                                         |
|           | F84.2                                            | Rett's syndrome                                                             |
|           | G10                                              | Huntington's disease                                                        |
|           | G11.1                                            | Early-onset cerebellar ataxia                                               |
|           | G11.3                                            | Cerebellar ataxia with defective DNA repair                                 |
|           | G12.0                                            | Infantile spinal muscular atrophy, type I (Werdnig-Hoffman)                 |
|           | G20                                              | Parkinson disease                                                           |
|           | G23.0                                            | Hallervorden-Spatz disease                                                  |
|           | G23.8                                            | Other specified degenerative diseases of the basal ganglia                  |
|           | G31.8                                            | Other specified degenerative diseases of the nervous system                 |
|           | G31.9                                            | Degenerative disease of the nervous system, unspecified                     |
|           | G35                                              | Multiple sclerosis                                                          |
|           | G40.4                                            | Other generalized epilepsy and epileptic syndromes, not intractable         |
|           | G40.5                                            | Epileptic seizures related to external causes, not intractable              |
|           | G60.0                                            | Hereditary motor and sensory neuropathy                                     |
|           | G60.1                                            | Refsum's disease                                                            |
|           | G70.2                                            | Congenital and developmental myasthenia                                     |
|           | G70.9                                            | Myoneural disorder, unspecified                                             |
|           | G71.0                                            | Muscular dystrophy                                                          |
|           | G71.1                                            | Myotonic disorders                                                          |
|           | G71.2                                            | Congenital myopathies                                                       |
| G71.3     | Mitochondrial myopathy, not elsewhere classified |                                                                             |
| G80.0     | Spastic quadriplegic cerebral palsy              |                                                                             |

|                            |                    |                                                                  |                                                                            |
|----------------------------|--------------------|------------------------------------------------------------------|----------------------------------------------------------------------------|
|                            | G80.8              | Other cerebral palsy                                             |                                                                            |
|                            | G82.3              | Flaccid tetraplegia                                              |                                                                            |
|                            | G82.4              | Spastic tetraplegia                                              |                                                                            |
|                            | G82.5              | Quadriplegia                                                     |                                                                            |
|                            | G93.4              | Other and unspecified encephalopathy                             |                                                                            |
|                            | G93.6              | Cerebral edema                                                   |                                                                            |
|                            | G93.7              | Reye's syndrome                                                  |                                                                            |
| <b>Metabolic</b>           | E31.0              | Autoimmune polyglandular failure                                 |                                                                            |
|                            | E34.8              | Other specified endocrine disorders                              |                                                                            |
|                            | E70.2              | Disorder of tyrosine metabolism, unspecified                     |                                                                            |
|                            | E71.0              | Maple-syrup-urine disease                                        |                                                                            |
|                            | E72.0              | Diseases of amino acid transport                                 |                                                                            |
|                            | E74.0              | Glycogen storage disease                                         |                                                                            |
|                            | E75.0              | GM2 gangliosidosis                                               |                                                                            |
|                            | E76.0              | Mucopolysaccharidosis, type I                                    |                                                                            |
|                            | E77.0              | Defects in post-translational modification of lysosomal enzymes  |                                                                            |
|                            | E79.1              | Lesch-Nyhan syndrome                                             |                                                                            |
|                            | E83.0              | Disorders of copper metabolism                                   |                                                                            |
|                            | E88.0              | Disorders of plasma-protein metabolism, not elsewhere classified |                                                                            |
|                            | E88.1              | Lipodystrophy, not elsewhere classified                          |                                                                            |
| <b>Otherwise Specified</b> | <b>Haematology</b> | B20                                                              | HIV resulting in infectious and parasitic diseases                         |
|                            |                    | B21                                                              | HIV resulting in malignant neoplasms                                       |
|                            |                    | B22                                                              | HIV resulting in other specified diseases                                  |
|                            |                    | B23                                                              | HIV resulting in other conditions                                          |
|                            |                    | B24                                                              | Unspecified HIV disease                                                    |
|                            |                    | D56.1                                                            | Beta thalassemia                                                           |
|                            |                    | D61.0                                                            | Constitutional aplastic anemia                                             |
|                            |                    | D61.9                                                            | Aplastic anemia, unspecified                                               |
|                            |                    | D70.0                                                            | Congenital agranulocytosis                                                 |
|                            |                    | D76.1                                                            | Hemophagocytic lymphohistiocytosis                                         |
|                            |                    | D81.0                                                            | Severe combined immunodeficiency (SCID) with reticular dysgenesis          |
|                            |                    | D82.1                                                            | Di George's syndrome                                                       |
|                            |                    | D83.0                                                            | Common variable immunodeficiency with predominant abnormalities of B-cells |
|                            |                    | D89.1                                                            | Cryoglobulinemia                                                           |
|                            | <b>Respiratory</b> | E84.0                                                            | Cystic fibrosis with pulmonary manifestations                              |
|                            |                    | J84.1                                                            | Other interstitial pulmonary diseases with fibrosis                        |
|                            |                    | J96.0                                                            | Acute respiratory failure                                                  |
|                            |                    | J98.4                                                            | Other disorders of lung                                                    |

|                         |       |                                                                |
|-------------------------|-------|----------------------------------------------------------------|
| <b>Circulatory</b>      | I21.0 | ST elevation (STEMI) myocardial infarction of anterior wall    |
|                         | I27.0 | Primary pulmonary hypertension                                 |
|                         | I42.0 | Dilated cardiomyopathy                                         |
|                         | I61.3 | Nontraumatic intracerebral hemorrhage in the brain stem        |
|                         | I81   | Portal vein thrombosis                                         |
| <b>Gastrointestinal</b> | K55.0 | Acute vascular disorders of the intestine                      |
|                         | K55.9 | Vascular disorder of the intestine, unspecified                |
|                         | K72.0 | Acute and subacute hepatic failure                             |
|                         | K74.0 | Hepatic fibrosis                                               |
|                         | K76.5 | Hepatic veno-occlusive disease                                 |
|                         | K86.8 | Other specified diseases of the pancreas                       |
| <b>Genitourinary</b>    | N17.0 | Acute kidney failure with tubular necrosis                     |
|                         | N18   | Chronic kidney disease                                         |
|                         | N19   | Unspecified kidney failure                                     |
|                         | N25.8 | Other disorders resulting from impaired renal tubular function |
| <b>Other</b>            | H11.1 | Conjunctival degenerations and deposits                        |
|                         | H49.8 | Other paralytic strabismus                                     |
|                         | H35.5 | Hereditary retinal dystrophy                                   |
|                         | M31.3 | Wegener's granulomatosis                                       |
|                         | M32.1 | Systemic lupus erythematosus with organ or system involvement  |
|                         | M89.5 | Osteolysis                                                     |
|                         | T86.0 | Complications of bone marrow transplant                        |
|                         | T86.2 | Complications of heart transplant                              |
|                         | Z51.5 | Encounter for palliative care                                  |

## Reference

1. Codes and classifications for clinical health data. Ottawa: Canadian Institute for Health Information. Available: <https://www.cihi.ca/en/submit-data-and-view-standards/codes-and-classifications> (accessed 2022 May 13).
